# Supplementary material for: Multi-site integrated optical addressing of trapped ions
Source: Springer Nature journal article supplement (doi:10.1038/s41467-024-47882-5), 2024-05-02
Supplement: 41467_2024_47882_MOESM1_ESM.pdf [file 41467_2024_47882_MOESM1_ESM.pdf]

## Supplementary Information:

# Multi-site Integrated Optical Addressing of Trapped Ions

Joonhyuk Kwon<sup>1,\*</sup>, William J. Setzer<sup>1</sup>, Michael Gehl<sup>1</sup>, Nicholas Karl<sup>1</sup>, Jay Van Der Wall<sup>1</sup>,  
Ryan Law<sup>1</sup>, Matthew G. Blain<sup>1,2</sup>, Daniel Stick<sup>1</sup>, Hayden J. McGuinness<sup>1,†</sup>

1. Sandia National Laboratories, Albuquerque, New Mexico 87185, USA;

2. Present Address: Quantinum LLC, 303 S Technology Ct, Broomfield, CO 80021, USA;

\* Corresponding author; e-mail: [jookwon@sandia.gov](mailto:jookwon@sandia.gov)

† Corresponding author; e-mail: [hmcgui@sandia.gov](mailto:hmcgui@sandia.gov)

## **Supplementary Figures**

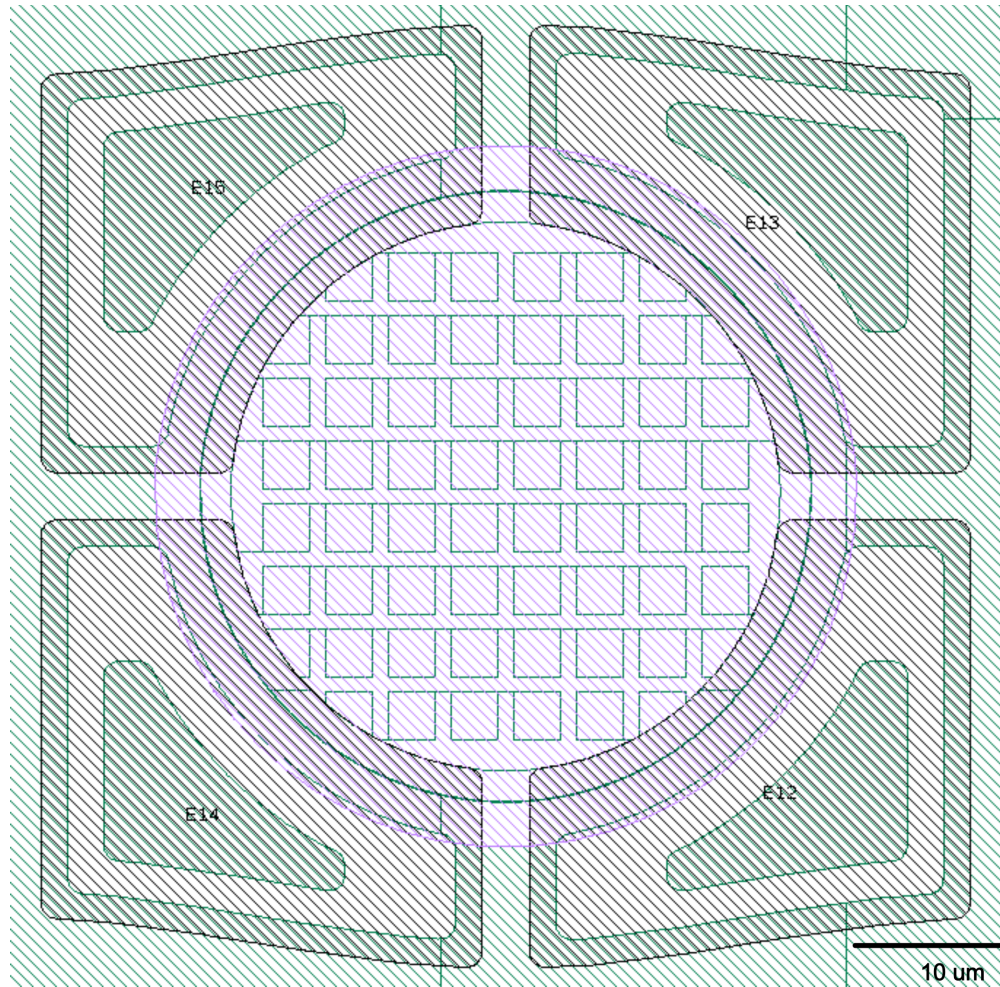

**Supplementary Fig. 1. Lithography mask in the SPAD region** A metal mesh is located on top of the SPAD (purple circle), consisting of  $3\ \mu\text{m} \times 3\ \mu\text{m}$  holes with  $1\ \mu\text{m}$  wide metal traces. The mesh and SPAD are surrounded by nearby electrodes, also shown in Fig. 1a.

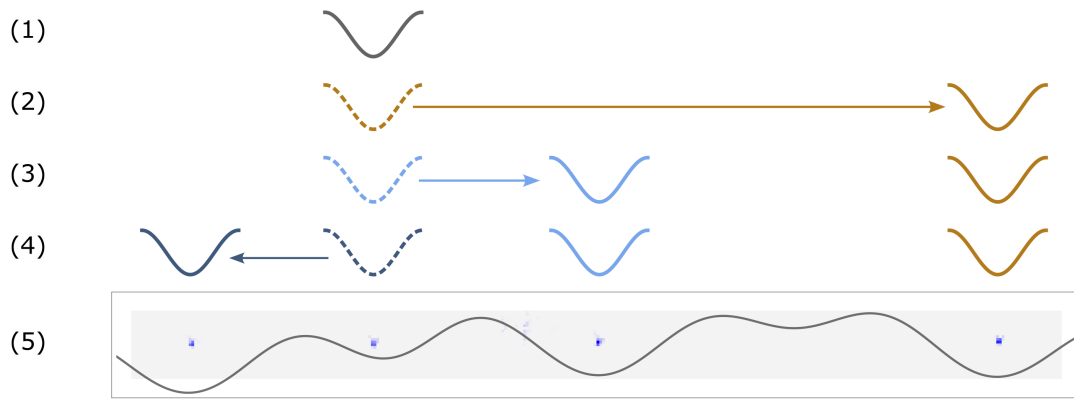

**Supplementary Fig. 2. Multi-ion loading sequence** Three waveguide-illuminated independent ions are loading sequentially, starting from one loading location that used free-space beams. 3+1 ions are trapped simultaneously by generating potential wells and loading/shuttling ions via steps (1) to (5). The potential plot at (5) represents a real four-ion solution that is used in this work, providing secular frequencies of  $2\pi \times 1.02\text{MHz}$ .

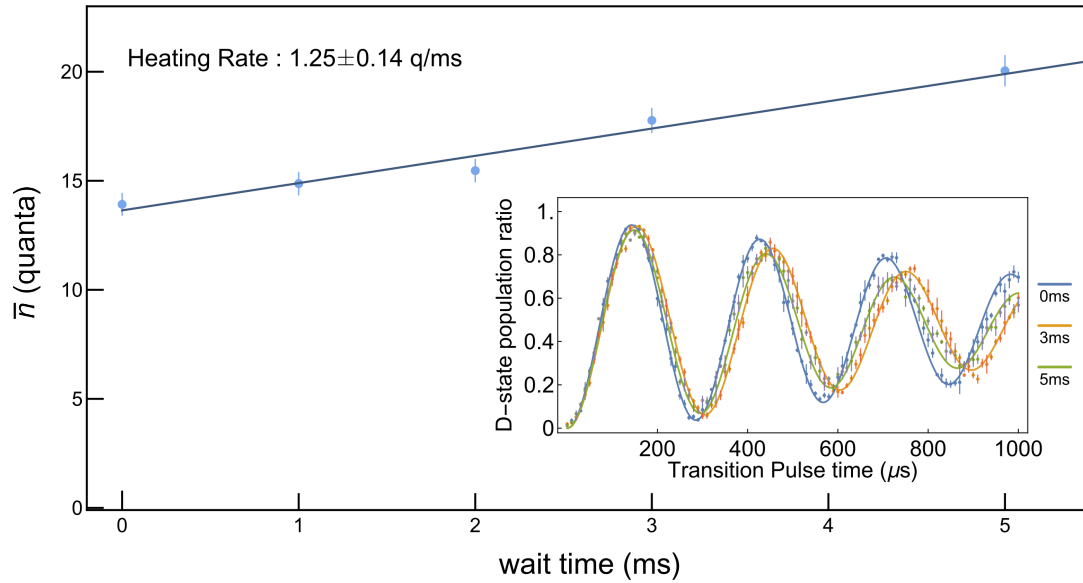

**Supplementary Fig. 3. Heating rate measurement** A heating rate of  $1.25 \pm 0.14$  q/ms is measured using fully integrated beams for state preparation, cooling, and Rabi flopping, while a free-space beam is used for detection. **inset:** Measured Rabi flopping for different wait times.
